# Supplementary material for: The Molecular Basis for Control of ETEC Enterotoxin Expression in Response to Environment and Host
Source: PubMed Central journal article supplement (PMC4287617; doi:10.1371/journal.ppat.1004605), 2015-01-08

# Figure S1

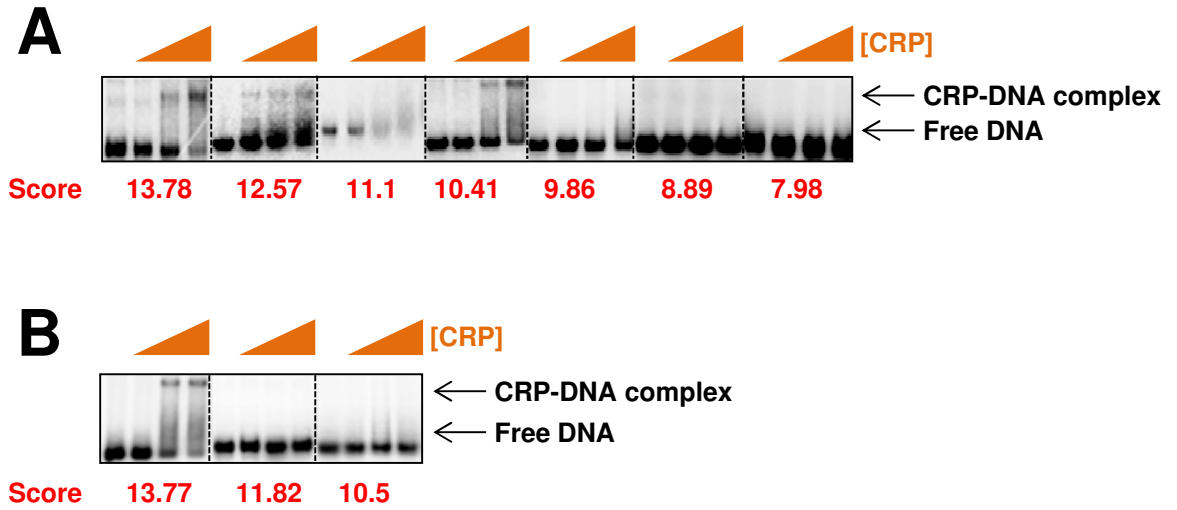

Supplement: ppat.1004605.s001.pdf [file ppat.1004605.s001.pdf]
