# Supplementary material for: The Molecular Basis for Control of ETEC Enterotoxin Expression in Response to Environment and Host
Source: PubMed Central journal article supplement (PMC4287617; doi:10.1371/journal.ppat.1004605), 2015-01-08
Supplement: ppat.1004605.s002.pdf [file ppat.1004605.s002.pdf]

# Figure S2

**estA coding sequence**

**eltAB coding sequence**

**transcription start site**

**CRP site predicted by Bodero and Munson**

**CRP binding site identified in this work**

**UP element**

**Promoter -10 and -35 elements**

## A

### PestA2 93 base pair fragment

TATGATACACATCACA~~AAAAAATAAAAAA~~GT**TTGCGC**CAATCGTTCTGATTTTGATTTAAATATTTCGTG  
GACGACGTGTTTCGGAGGTAAT**ATG**

### PestA2 93 base pair fragment with UP element mutated

TATGATACACATCACA~~gcAcAgcgAcAA~~GT**TTGCGC**CAATCGTTCTGATTTTGATTTAAATATTTCGTG  
GACGACGTGTTTCGGAGGTAAT**ATG**

### PestA2 460 base pair fragment

CCGGGGCGGTTTCATTGTTATTTTTTTTGTGATTAACCCCCACAAAAATAGTCATTCAACATAAAATATA  
TCATTTTATTTAAGCAATCTTTTCTGTTTTTTCGGCCGCCCTAAAACATAATATTATTATGCTCTTCG  
TAGCGGAGAGTATAG**TATGA**TACACATCACA~~AAAAAATAAAAAA~~GT**TTGCGC**CAATCGTTCTGATTTTG  
ATTTAAATATTTCGTGGACGACGTGTTTCGGAGGTAAT**ATGAAAAAATCAATATTATTTATTTTCTTT**  
**CTGTATTATCTTTTTCACCTTTCGCTCAGGATGCTAAACCAGCAGGGTCTTCAAAGAAAAAATTACA**  
**CTAGAATCGAAAAATGTAACATTGTAATAAAAAAATAATGAAAGTAGTCCTGAAAGCATGAATAGTAG**  
**CAATTACTGCTGTGAATTGTGTTGTAATCCTGCTTGTACCGGGTGCTATTAA**

### PestA2 460 base pair fragment with CRP site mutated

CCGGGGCGGTTTCATTGTTATTTTTTTTGTGATTAACCCCCACAAAAATAGTCATTCAACATAAAATATA  
TCATTTTATTTAAGCAATCTTTTCTGTTTTTTCGGCCGCCCTAAAACATAATATTATTATGCTCTTCG  
TAGCGGAGAGTATAGAAA**G**TACACAA**CTCT**~~AAAAAATAAAAAA~~GT**TTGCGC**CAATCGTTCTGATTTTG  
ATTTAAATATTTCGTGGACGACGTGTTTCGGAGGTAAT**ATGAAAAAATCAATATTATTTATTTTCTTT**  
**CTGTATTATCTTTTTCACCTTTCGCTCAGGATGCTAAACCAGCAGGGTCTTCAAAGAAAAAATTACA**  
**CTAGAATCGAAAAATGTAACATTGTAATAAAAAAATAATGAAAGTAGTCCTGAAAGCATGAATAGTAG**  
**CAATTACTGCTGTGAATTGTGTTGTAATCCTGCTTGTACCGGGTGCTATTAA**

## B

### PestA1 92 base pair fragment

CATGATGCAAC**TACA**~~AAAAAATAAAAAA~~**TTGCAA**AATCCGTTTAACTAATCTCAAATATCCGTGA  
AACAAACATGACGGGAGGTAAC**ATG**

### **PestA1 350 base pair fragment**

ATGAAAATAATATATAAAAAAGCGAGTGTACCTCGACATATAA**CATGA**TGCAAC**TCACA**AAAAAATAA  
**AAAAATTGCAA**AATCCGTTTAACTAAT**TCAAAT**ATCCGT**G**AAACAACATGACGGGAGGTAAC**ATGAA**  
**AAAGCTAATGTTGGCAATTTTTATTTCTGTATTATCTTTCCCTCTTTTAGTCAGTCAACTGAATCAC**  
**TTGACTCTTCAAAAGAGAAAATTACATTAGAGACTAAAAGTGTGATGTTGTAAAAACAACAGTGAA**  
**AAAAATCAGAAATATGAACAACACATTTTACTGCTGTGAACTTTGTGTAAATCCTGCCTGTGCTGG**  
**ATGTTATTAA**

## **C**

### **PeltAB 1127 base pair fragment**

TTCTGGTGTGGACTTTCTGGTGCTCCAGGTTG**TGTGA**CATGGG**AACTC**ATTCTGGATGGTTACTCTGA  
AAGTCATATTCTGCCACCCCCGATTTGCAGCCGCCAAGCTGCCGTGGTTCAAGTCGCGACTAATAA  
AAATAATCAGGTTGCCATGATTC**AATGT**ACACCT**TTCTC**ACATTCGTCTCCGGCATGAAAACGATGCA  
CTCTTTCTTTATCGCTTTCACTACACATTTTATCCTCGCATGGATGTTTTATAAAAA**CATGATTGAC**  
**ATCATG**TTGCATATAGGT**TAAACA**AAACAA**G**TGGCGTTATCTTTTTCCGGATTGTCTTCTTGTATGAT  
ATATAAGTTTTCTCG**ATG**AAAAATATAACTTTTCTTTTTTTTTATTATTAGCATCGCCATTATATG  
CAAATGGCGACAAATTATACCGTGCTGACTCTAGACCCCAGATGAAATAAACGTTCCGGAGGTCTT  
ATGCCAGAGGGCATAATGAGTACTTCGATAGAGGAACCTCAAATGAATATTAATCTTTATGATCACGC  
GAGAGGAACACAAACCGGCTTTGTCAGATATGATGACGGATATGTTTCCACTTCTCTTAGTTTGAGAA  
GTGCTCACTTAGCAGGACAGTCTATATTATCAGGATATTCACTTACTATATATGTTATAGCGACA  
GCACCAATATGTTAATGTTAATGATGTATTAGGCGTATACAGCCCTCACCCATATGAACAGGAGGT  
TTCTGCGTTAGGTGGAATACCATATTCTCAGATATATGGATGGTATCGTGTAAATTTGGTGTGATTG  
ATGAACGATTACATCGTAACAGGGAATATAGAGACCGGTATTACAGAAATCTGAATATAGCTCCGGCA  
GAGGATGGTTACAGATTAGCAGGTTTCCACCGGATCACAGGCTTGGAGAGAAGAACCCTGGATTCA  
TCATGCCACCAAGGTTGTGGAAATTCATCAAGAACAATTACAGGTGATACTTGTAAATGAGGAGACCC  
AGAATCTGAGCACAATATATCTCAGGAAATATCAATCAAAAGTTAAGAGGCAGATATTTTCAGACTAT  
CAGTCAGAGGTTGACATATATAACAGGATTCGGAATGAA

### **PeltAB 359 base pair fragment**

TTCTGGTGTGGACTTTCTGGTGCTCCAGGTTG**TGTGA**CATGGG**AACTC**ATTCTGGATGGTTACTCTGA  
AAGTCATATTCTGCCACCCCCGATTTGCAGCCGCCAAGCTGCCGTGGTTCAAGTCGCGACTAATAA  
AAATAATCAGGTTGCCATGATTC**AATGT**ACACCT**TTCTCA**CATTTCGTCTCCGGCATGAAAACGATGCA  
CTCTTTCTTTATCGCTTTCACTACACATTTTATCCTCGCATGGATGTTTTATAAAAA**CATGATTGAC**  
**ATCATG**TTGCATATAGGT**TAAACA**AAACAA**G**TGGCGTTATCTTTTTCCGGATTGTCTTCTTGTATGAT  
ATATAAGTTTTCTCG**ATG**

### **PeltAB 118 base pair fragment**

GCATGGATGTTTTATAAAAA**CATGATTGACA****TCATG**TTGCATATAGGT**TAAACA**AAACAA**G**TGGCGT  
TATCTTTTTCCGGATTGTCTTCTTGTATGATATATAAGTTTTCTCG**ATG**

### **PeltAB 118 base pair fragment with putative CRP site mutated**

GCATGGATGTTTTATAAAAA**CA**AC**ATTGACAT**GT**TC**TTGCATATAGGT**TAAACA**AAACAA**G**TGGCGT  
TATCTTTTTCCGGATTGTCTTCTTGTATGATATATAAGTTTTCTCG**ATG**

# D

## ***PeltAB* 1126 base pair fragment from ETEC E24377A**

TTCTGGTGTGGACTTTCTGGTGCTCCAGGTTG **TGTGA** CATGGG **AACTC** ATTCTGGATGGT TACTCTGA  
AAGCTCATATTCTGCCCCCCCCGATTTGCAGCCGCCAGGCTGCCGTGGTTCAAGTCGCGACTAATAAA  
AATAATCAGGTTGCCATGATTC **AATGT** ACACCT **TTCTC** ACATTTCGTCTCCGGCATGAAAACGATGCAC  
TCTTTCTTTATCGCTTTCACTACACATTTTATCCTCGCATGGATGTTTTATAAAAAA **CATGA** **TTGACA**  
**TCATG** TTGCATATAGG **TTAAAC** AAAACAAG **T** TAGCGTTATCTTTTTCCGGATTGCTTTCTTGTATGATA  
TATAAGTTTTCTCG **A** TGAAAAATATAACTTTCATTTTTTTTATTTTATTAGCATCGCCATTATATGC  
AAATGGCGACAAATTATACCGTGCTGACTCTAGACCCCCAGATGAAATAAAACGTTCCGGAGGTCTTA  
TGCCAGAGGGCATAATGAGTACTTCGATAGAGGAACTCAAATGAATATTAATCTTTATGATCACGCG  
AGAGGAACACAAACCGGCTTTGTCAGATATGATGACGGATATGTTTCCACTTCTCTTAGTTTGAGAAG  
TGCTCACTTAGCAGGACAGTCTATATTATCAGGATATTCCACTTACTATATATATGTTATAGCGACAG  
CACCAAATATGTTAATGTTAATGATGTATTAGGCGTATACAGCCCTCACCCATATGAACAGGAGGTT  
TCTGCGTTAGGTGGAATACCATATTCTCAGATATATGGATGGTATCGTGTTAATTTTGGTGTGATTGA  
TGAACGATTACATCGTAACAGGGAATATAGAGACCGGTATTACAGAAATCTGAATATAGCTCCGGCAG  
AGGATGGTTACAGATTAGCAGGTTTCCCACCGGATCACCAAGCTTGGAGAGAAGAACCCTGGATTGAT  
CATGCACCACAAGGTTGTGGAAATTCATCAAGAACAATTACAGGTGATACTTGTAAATGAGGAGACCCA  
GAATCTGAGCACAATATATCTCAGGAAATATCAATCAAAAAGTTAAGAGGCAGATATTTTCAGACTATC  
AGTCAGAGGTTGACATATATAACAGAATTCGGGATGAA

## ***PestA2* 460 base pair fragment from ETEC E24377A**

CATTAAGTATGCATTGTTATTTTTTTGTGATTAACCCACAAAAACAGTCATTAACATAAATATATC  
ATTTTGCTTAAACAATCTTTTCTGTTTTTTTTCGGTCGCCGAAAAAGATAATATTACTATGCTCTTCGT  
AGCGGAGAGTATAG **TATGA** TGTTCA **TCACA** **AAAAAATAAAAAA** **AGTTTGCGC** AATCGTTCGGTTTTG  
AT **TCAAAT** GTTCGT **G** GATGCCATGTTCCGGAGGTAAT **ATGAAGAAATCAATATTATTTATTTTTCTTT**  
**CTGTATTGTCTTTTTACCTTTTCGCTCAGGATGCTAAACCAGTAGAGTCTTCAAAGAAAAAATCACA**  
**CTAGAATCAAAAAAATGTAACATTGCAAAAAAAGTAATAAAAGTGGTCCTGAAAGCATGAATAGTAG**  
**CAATTACTGCTGTGAATTGTGTGTAATCCTGCTTGTACCGGGTGCTATTAA**
