# Supplementary material for: The Molecular Basis for Control of ETEC Enterotoxin Expression in Response to Environment and Host
Source: PubMed Central journal article supplement (PMC4287617; doi:10.1371/journal.ppat.1004605), 2015-01-08

# Figure S3

## A

### i PestA2 93 base pair fragment

TATGATACACATCACA~~AAAAATAAAAA~~GTTGCGCAATCGTTCTGATTTTGATTTAAATATTCGTG  
GACGACGTGTTTCGGAGGTAATATG

### PestA2 93 base pair fragment with UP element mutated

TATGATACACATCACA~~gcAcAgcgAcAA~~GTTGCGCAATCGTTCTGATTTTGATTTAAATATTCGTG  
GACGACGTGTTTCGGAGGTAATATG

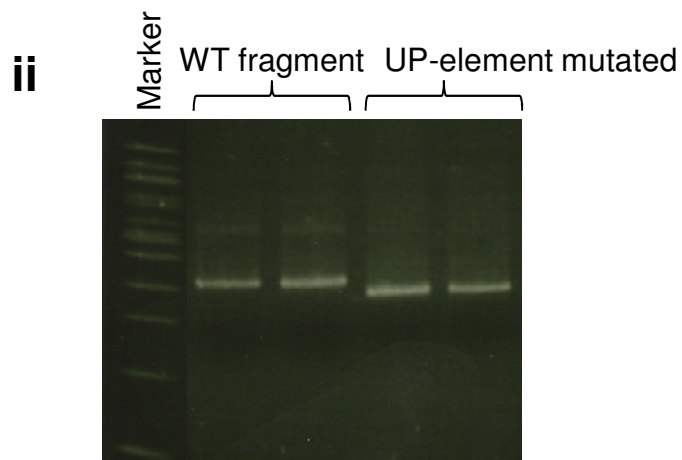

## B

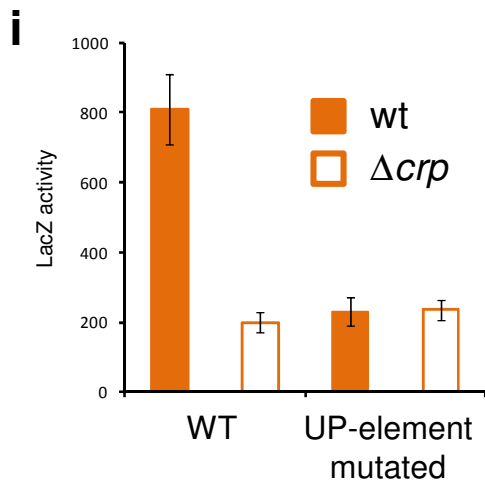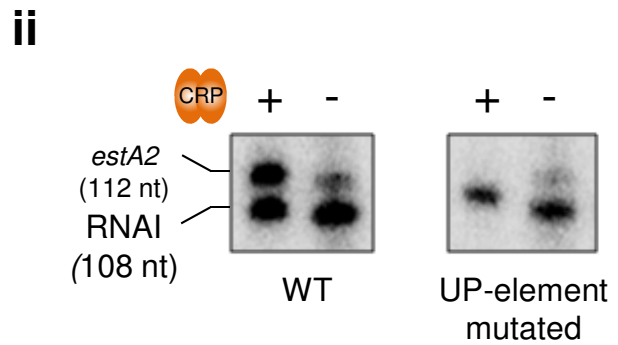

Supplement: ppat.1004605.s003.pdf [file ppat.1004605.s003.pdf]
