# Supplementary material for: The Molecular Basis for Control of ETEC Enterotoxin Expression in Response to Environment and Host
Source: PubMed Central journal article supplement (PMC4287617; doi:10.1371/journal.ppat.1004605), 2015-01-08
Supplement: ppat.1004605.s004.pdf [file ppat.1004605.s004.pdf]

# Figure S4

**A**

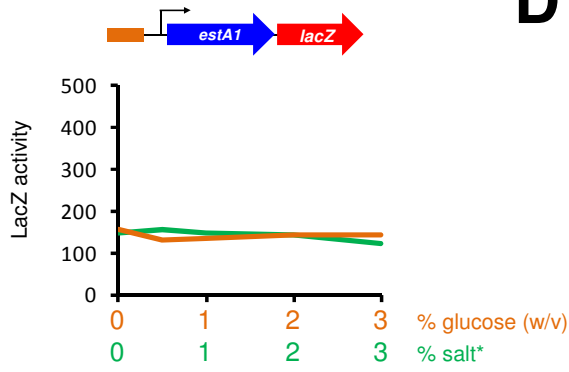

**B**

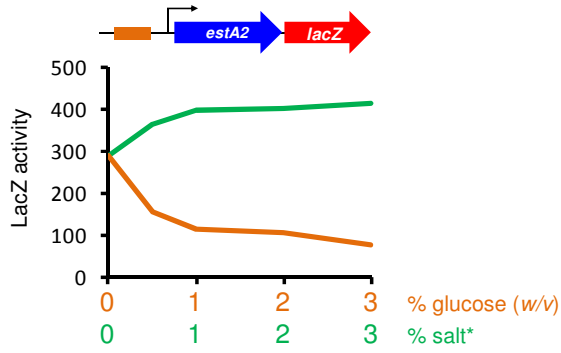

**C**

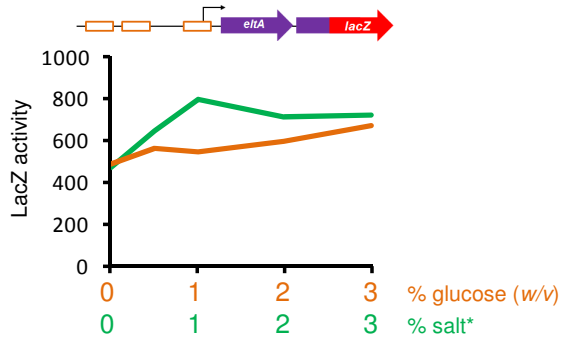

**D**

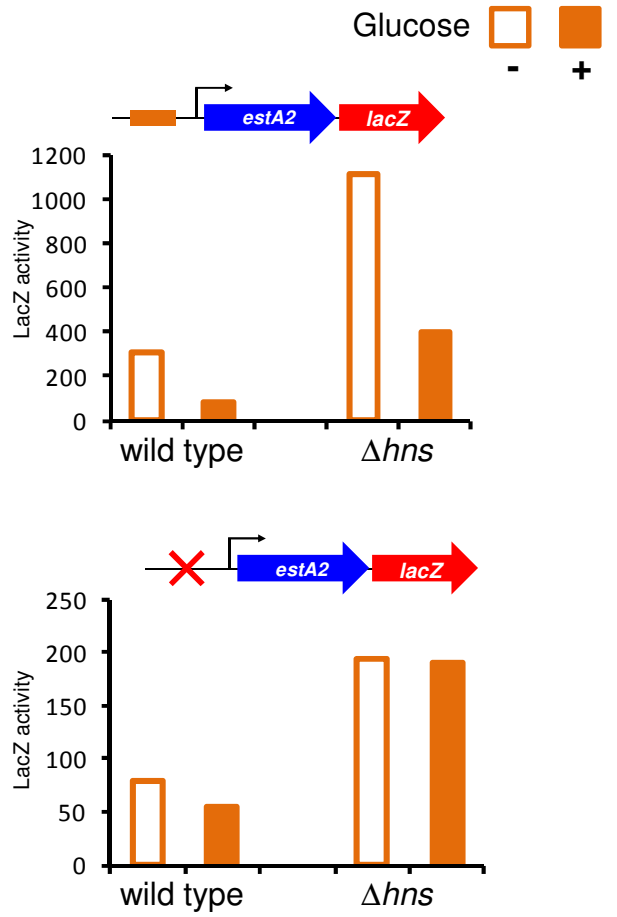

\*NaCl and KCl were added together in a 3:1 molar ratio. In these experiments, 1 % salt describes a final concentration of 30 mM NaCl and 10 mM KCl.
